1                   **Beneath the surface: mental health, and**  
2                   **harassment and abuse of athletes participating in**  
3                   **the FINA (Aquatics) World Championships, 2019**

4 Margo Mountjoy<sup>1,2,3</sup>, Astrid Junge<sup>4,5</sup>, Christer Magnusson<sup>2</sup>, Farhad Moradi Shahpar<sup>2</sup>,  
5 Edgar Ivan Ortiz Lizcano<sup>2</sup>, Josip Varvodic<sup>2</sup>, Xinzhai Wang<sup>2</sup>, Mohamed Yahia Cherif<sup>2</sup>,  
6 Lee Hill<sup>1</sup>, Jim Miller<sup>2,6</sup>

7 From:

8 1 McMaster University Hamilton, Hamilton, Canada  
9 2 Federation Internationale de Natation (FINA), Lausanne, Switzerland  
10 3 International Olympic Committee (IOC), Games Group and Working Group on the  
11 Prevention of Harassment and Abuse in Sport Lausanne, Switzerland  
12 4 Medical School University of Hamburg, Hamburg, Germany  
13 5 Swiss Concussion Centre at Schulthess Clinic Zürich, Switzerland  
14 6 Medicine Department, University of Virginia, Charlottesville, and Virginia  
15 Commonwealth University, Richmond, Virginia, USA  
16

17 **Contact for corresponding author:**

18 Dr. Margo Mountjoy  
19 McMaster Medical School  
20 10-B Victoria Street South  
21 Kitchener, ON, Canada N2G 1C5  
22 Email: mmsportdoc@mcmaster.ca  
23 Phone: +1 226 971 2940  
24

25 **Word Count:** 3130

26  
27 **Abstract word count** 249

28  
29 **Number of Tables and Figures:** 3

30  
31 **Original Research:** Sport Medicine + Sport Psychology

32 **Patient and Public Involvement:**

33 Athlete representatives and members of the FINA Athletes Commission were  
34 involved in determining the research priority of mental health and safeguarding, as

35 well as actively recruiting participants and promoting the research project during the  
36 FINA World Championships. We will invite athletes and the entourage to help with  
37 dissemination and application of the results.

38

39 **Scientific contributions of each author:**

40 **Margo Mountjoy, MD, PhD:** Substantial contributions to the conception and design  
41 of the study, collection and interpretation of data, drafting, writing, and revising of the  
42 manuscript, and approval of the final version to be published.

43 **Astrid Junge, PhD:** Substantial contributions to the conception and design of the  
44 study, analysis and interpretation of data, drafting, writing, and revising of the  
45 manuscript, and approval of the final version to be published.

46 **Christer Magnusson, MD, Farhad Moradi Shapar, MD, PhD, Edgar Ivan Ortiz**  
47 **Lizcano, MD, Josip Varvodic, MD, Xinzhai Wang, MD, Mohamed Yahia Cherif**  
48 **MD:** Contributions to data collection and approval of the final version to be published.

49 **Lee Hill, PhD:** Substantial contributions to data collection and approval of the final  
50 version to be published.

51 **Jim Miller, MD, FAAFP/Sports Medicine:** Substantial contributions to conception of  
52 the study, as well as data collection and approval of the final version to be published.

53

54 All authors agree to be accountable for all aspects of the work in ensuring that  
55 questions related to the accuracy or integrity of any part of the work are appropriately  
56 investigated and resolved.

57

58 **Funding:** The data collection was funded by the Federation Internationale de  
59 Natation (FINA), Lausanne, Switzerland. FINA had no role in the study design, the  
60 collection, analysis, and interpretation of the data, writing the report, or the decision

61 to submit the article for publication. No other funding was received for the present  
62 study.

63

64 **Competing Interest:** None declared.

65

66 **Ethics approval:** The present study had ethic approval from McMaster University -  
67 Hamilton Integrated Research Ethics Board, Canada.

68

69 **No Additional data:** No supplementary data.

70

71 **Abbreviations:**

72 AS: Artistic swimming

73 BEDA-Q: Brief Eating Disorders in Athletes Questionnaire

74 CES-D-10: Center for Epidemiological Studies Depression Scale revised

75 DV: Diving

76 FINA: Federation Internationale de Natation

77 HD: High Diving

78 IOC: International Olympic Committee

79 OWS: Open water swimming

80 SW: Swimming

81 WC: World Championships

82 WP: Water polo

83

84 **ABSTRACT**

85

86 **Objective:** To assess the mental health and experience of sport-related harassment  
87 and abuse of athletes participating in the FINA World Championships 2019, and to  
88 analyse it in relation to gender and the aquatic disciplines.

89 **Design:** Cross-sectional study using an anonymous questionnaire.

90 **Methods:** During the Championships, registered athletes (swimmers, divers, high  
91 divers, water polo players, artistic swimmers, open-water swimmers) completed a  
92 survey including the main outcome measures of depression (CES-D-10), eating  
93 disorders (BEDA-Q), the subjective need for psychotherapeutic support, and the  
94 experience of harassment and/or abuse in their sports environment.

95 **Results:** A quarter of the athletes (n=62, 24.6%) were classified as depressed and  
96 more than a third (n=111, 35.0%) as having an eating disorder. More than 40% of the  
97 athletes stated that they wanted or needed psychotherapeutic support for mental  
98 health problems. Fifty-one athletes (14.9%) had experienced harassment/abuse in  
99 sport themselves, and 31 (9%) had witnessed it in another athlete. The experiences  
100 of harassment and abuse ranged from unwanted comments about body or  
101 appearance (40.2%) to rewards in sport for sexual favours (2.5%) and rape (0.3%).  
102 Athletes who had experienced harassment/abuse in sport themselves had higher  
103 average scores for depression and eating disorders, and more of them needed  
104 psychotherapeutic support. Up to a third would not talk to anybody if they saw or  
105 experienced harassment/abuse, and less than 20% would talk to an official for help.

106 **Conclusion:** Targeted initiatives are required to address the burden of mental health  
107 issues and harassment and abuse in sport in the FINA aquatic disciplines.

108

109 **Keywords:** aquatics, elite sports, mental health, depression, harassment + abuse

## 110 INTRODUCTION

111

112 *"I didn't want to be in the sport anymore ... I didn't want to be alive anymore."* Michael  
113 Phelps 2018<sup>1</sup>

114

115 The sport community was shocked when Michael Phelps, the most decorated

116 Olympian of all time, first spoke about his struggles with mental health issues in

117 2016.<sup>2</sup> A systematic review and meta-analysis of mental health of elite athletes

118 revealed a prevalence of 33.6% for anxiety/depression, 26.4% sleep disturbance,

119 19.6% symptoms of distress, 9% for alcohol misuse, and 1%–28% for adverse eating

120 habits or eating disorder.<sup>3</sup> There is a well-established correlation between mental

121 health symptomatology and experience with harassment/abuse both inside and

122 outside of sport.<sup>4</sup> In athletics, a cross-sectional study of 198 elite Swedish athletes,

123 suicidal ideation of the female athletes was associated with having been sexually

124 abused combined with signs of psychological vulnerability.<sup>5</sup> A cohort study on

125 Canadian national team athletes demonstrates statistically significant correlations

126 between harassment/abuse in sport and mental health outcomes defined as self-

127 harm, disordered eating and eating disorders, suicidal thoughts and seeking help for

128 mental health issues.<sup>6</sup>

129 While the original IOC publication on sexual harassment/abuse in sport was

130 published in 2007,<sup>7</sup> the IOC first implemented safeguarding against

131 harassment/abuse at the 2016 Olympic Games,<sup>8</sup> and published an updated

132 consensus statement.<sup>9</sup> A research project was conducted at the Youth Olympic

133 Games 2018 to assess the participating elite youth athletes' understanding and

134 perception of harassment/abuse in their respective sports. About a third stated that it

135 'very likely' or 'likely' occurred in their sport.<sup>10</sup> This study is the only publication on

136 harassment/abuse in a large cohort of international multi-sport elite athletes.

137 While there has been a recent increase in scientific publications on mental  
138 health and harassment/abuse in sport, there remains a dearth of scientific evidence  
139 of the elite aquatic athletes' experience in these domains. In order to address this  
140 gap in knowledge, the objectives of this study were to assess the athletes' mental  
141 health problems and their experience of sport-related harassment/abuse, and to  
142 analyse these findings in relation to gender and the aquatic disciplines.

143

## 144 **MATERIALS AND METHODS**

145 An anonymized survey for accredited athletes was performed during the FINA  
146 World Championships (WC), 2019 using the same recruitment and data collection  
147 procedures as in previous studies.<sup>11-13</sup>

148 The **questionnaire** started with questions on gender, age, and aquatic  
149 discipline, followed by two questions on the extent of health complaints and their  
150 effect on performance or participation in the four weeks prior to the WC (based on  
151 the Oslo Trauma Research Centre Questionnaire<sup>14</sup>).

152 **Mental health** was assessed using the 10-item version of the Center for  
153 Epidemiological Studies Depression Scale revised (CESD-R-10),<sup>15,16</sup> the Brief Eating  
154 Disorders in Athletes Questionnaire (BEDA-Q)<sup>17</sup> and the question "Have you ever  
155 wanted or needed support from a psychotherapist for personal or mental health  
156 problems?" (no/ yes, previously / yes, currently).<sup>18</sup>

157 The section on **harassment and abuse** was newly developed based on the  
158 review of the literature.<sup>10,19</sup> It consisted of two introductory questions „Do you think  
159 harassment and/or abuse occurs in your sport?" (no/not likely/not sure/likely/very  
160 likely) and „Have you ever witnessed or experienced yourself any forms of  
161 harassment or abuse in your sports environment?" (no/yes, experienced myself/yes,  
162 witnessed in another athlete) followed by a table with 13 situations, for each the

163 athlete should report whether or not they had witnessed or experienced it  
164 themselves, and if so, who did it (coach/another athlete/others). For details see Table  
165 1.

166 The data were processed Excel (Microsoft Office 2011) and SPSS (V.23,  
167 IBM). The results are reported using means with standard deviation or frequencies  
168 with percentage, and in accordance with STROBE guidelines. We applied ANOVA, t-  
169 and Chi<sup>2</sup>-test statistical methods with an accepted significance at  $p < 0.05$ .

170 Support for travel to the FINA WC for data collection was funded by the FINA.  
171 Although FINA approved the project, it had no oversight or influence over the data  
172 collection, analysis, interpretation of results or drafting of the manuscript. Ethical  
173 design followed the principles of the Declaration of Helsinki for experiments involving  
174 humans, including informed consent and observation of privacy rights; ethical  
175 approval was granted by the Hamilton Integrated Research Ethics Board.

176

## 177 **RESULTS**

178 A total of 377 athletes participating in the 2019 FINA WC answered the questionnaire  
179 (response rate: 14.8%). The 229 (61.1%) female and 146 (38.9%) male athletes  
180 were on average 22.4 years old (SD=5.37; range: 14-56), with female participants  
181 (21.4, sd=4.71) being significantly younger than male (23.9; sd=5.93;  $t=4.48$ ,  
182  $p < .001$ ). The majority of participants were swimmers (SW,  $n=132$ , 36.2%), water polo  
183 players (WP,  $n=82$ , 22.5%) and artistic swimmers (AS,  $n=79$ , 21.6%) followed by  
184 divers (DV,  $n=43$ , 11.8%), high divers (HD,  $n=21$ , 5.8%) and open water swimmers  
185 (OWS,  $n=8$ , 2.2%).

186 In the 4 weeks prior to the WC, half of the athletes had no  
187 symptoms/complaints ( $n=181$ ), nor any ***injury, illness or other health*** problems that  
188 affected their performance or participation ( $n=187$ ; 51.8%). About a third reported

189 minor health problems (n=125; 34.5%), 40 (11.0%) moderate and 16 (4.4%) severe.  
190 More than a quarter of the athletes (n=100; 27.7%) reported minor, 51 (14.2%)  
191 moderate and 16 (4.4%) major effects of health problems on their performance;  
192 seven (1.9%) could not participate at all.

193 Based on their answers to the CES-D-10 (n=268, mean=7.38, sd=4.75, range  
194 0-25), a quarter of the athletes (n=62, 24.6%) were classified as **depressed** without  
195 significant differences between genders. The depression score correlated  
196 significantly with the extent of symptoms/health complaints ( $r=.30$ ,  $p<.001$ ) and their  
197 effect on performance in the four weeks prior to the WC ( $r=.28$ ,  $p<.001$ ).

198 Based on their answers to the six BEDA-Q questions (n=317, mean=0.67,  
199 sd=0.60, range 0-3), more than a third of the athletes (n=111, 35.0%) had an **eating**  
200 **disorder**. The proportion of athletes with an eating disorder differed significantly  
201 between females and males (40.2% vs 27.3%;  $\text{Chi}^2=5.5$ ,  $p<.05$ ). Athletes with an  
202 eating disorder had a significantly higher depression score ( $F=4.8$ ;  $p<.05$ ). Thirty  
203 athletes (11.6%) were classified to have both depression and eating disorder. About  
204 a quarter of the athletes (n=90, 25.1%) stated that they were *trying to lose weight*  
205 *now* (i.e. during the WC), with significantly more females than males (31.7% vs  
206 14.8%;  $\text{Chi}^2=12.6$ ,  $p<.001$ ). Sixty athletes (17.4%) had tried to lose weight more than  
207 five times.

208 More than 40% of the athletes stated that they “wanted or needed  
209 **psychotherapeutic support** for personal or mental health problems” previously  
210 (n=103, 28.8%) or currently (n=57, 15.9%) without differences across genders or  
211 ages. Athletes with and without a subjective need for psychotherapeutic support  
212 differed significantly ( $F=9.9$ ,  $p<.001$ ) in their average depression score. About half of  
213 the athletes (53.3%) who currently wanted or needed psychotherapeutic support for



214 personal or mental health problems were classified as depressed. No differences  
215 were observed regarding eating disorders.

216 About a third of the athletes thought that **harassment/abuse** occurs in their  
217 sport 'likely' (n=83, 23.9%) or 'very likely' (n=42, 12.1%). Seventy-five athletes  
218 (21.6%) were 'unsure', 43 (12.4%) regarded this as 'unlikely', and 105 athletes  
219 (30.2%) thought that 'no' harassment/abuse occurs in their sport. The answers  
220 differed significantly between genders ( $\text{Chi}^2=17.9$ ,  $p<.01$ ), with males regarding it  
221 more likely than females. Almost 80% of the athletes (n=273, 79.6%) stated that they  
222 have never witnessed or experienced themselves any forms of harassment/abuse in  
223 their sport environment. Fifty-one athletes (14.9%) had experienced it themselves,  
224 and 31 (9.0%) had witnessed it in another athlete (percentages include 12 athletes  
225 who had both) without difference between genders. Athletes with different  
226 experiences of harassment/abuse differed significantly ( $F=13.4$ ,  $p<.001$ ) on how  
227 likely they think it occurs in their sport. Athletes who had not witnessed nor  
228 experienced harassment/abuse regarded it as less likely than athletes who had  
229 witnessed it in another athlete or experienced it themselves, and those who had both  
230 experienced and witnessed it regarded it as most likely. Athletes with different  
231 experiences of harassment/abuse differed significantly in their average score of  
232 depression ( $F=4.6$ ,  $p<.01$ , see Figure 1) and eating disorder screening tools ( $F=5.0$ ,  
233  $p<.01$ , see Figure 1) as well as on the subjective need for psychotherapeutic support  
234 ( $\text{Chi}^2=15.4$ ,  $p<.05$ ). Athletes who experienced harassment/abuse themselves *and*  
235 witnessed it in another athlete had average lower values of depression and eating  
236 disorders than those who exclusively experienced it themselves (see Figure 1).

237

238

Insert Figure 1 here

239

240 From a list of 13 *situations of harassment/abuse in the sports environment*  
241 (see Table 1) 'unwanted comments about body or appearance' was the most  
242 frequently (40.2%) and 'rewards in sport for sexual favours' (2.5%) and 'rape'  
243 (reported as 'others' n=1, 0.3%) the least frequently witnessed or experienced  
244 situation. In general, situations were more frequently witnessed in another athlete  
245 than experienced themselves, except for 'inappropriate training', 'unsafe training  
246 conditions', and 'forced dieting, limited or no access to needed water or food'. About  
247 10% of the athletes had experience these situations, which were reported to have  
248 been perpetrated most often by the coach. On average, one in twenty athletes (5.0%)  
249 had experienced themselves 'unwanted and unnecessary touching of the body'  
250 mostly by the coach or another athlete. Three athletes (0.8%) had experienced  
251 'rewards in sport for sexual favours' themselves, and a further six (1.6%) had  
252 witnessed this in another athletes.

253

254

Insert Table 1 here

255

256 Significant more female than male athletes reported to have experienced  
257 harassment/abuse themselves with regard to 'unwanted comments about body or  
258 appearance' (38.5% vs 15.1%,  $\text{Chi}^2=19.1$ ,  $p<.001$ ), 'forced dieting, limited or no  
259 access to needed water or food' (11.8% vs 1.5%,  $\text{Chi}^2=12.3$ ,  $p<.001$ ), 'bullying /  
260 cyber bullying' (16.7% vs 5.3%,  $\text{Chi}^2=9.4$ ,  $p<.01$ ), 'unwanted and unnecessary  
261 touching of the body' (7.3% vs 2.2%,  $\text{Chi}^2=4.2$ ,  $p<.01$ ). About half of the athletes  
262 (n=181, 53.9%) reported they would talk to friends or family if they saw or  
263 experienced a situation like the ones listed in Table 1, but less than one in five (n=61,  
264 18.8%) would talk to an official contact to seek help. About one in eight athletes  
265 (n=43, 12.8%) would not talk to anybody, and 68 (20.2%) were not certain whether or

266 not to share the experience. The answers differed significantly between genders  
267 ( $F=22.7$ ,  $p<.001$ ). More than twice as many males than females (19.7% vs 8.7%)  
268 would not talk about it, and more females than males would talk to their friends and  
269 family (57.0%vs 33.9%).

270 **Specific analysis combining gender and discipline** were conducted for  
271 SW, WP, DV/HD (DV and HD combined) and female AS (see Table 2), since just  
272 three female and five male OWS and two male AS responded the survey.

273

274

Insert Table 2 here

275

276 *Gender differences within a discipline*, did not reach statistical significance due  
277 to the small subgroups, except for 'trying to lose weight now' in DV/HD ( $\chi^2=6.6$ ,  
278  $p<.05$ ), need for psychotherapy in WP ( $\chi^2=11.8$ ,  $p<.01$ ), 'talk about  
279 experience/witnessed harassment/abuse' in SW ( $\chi^2=20.6$ ,  $p<.001$ ), and  
280 'experienced themselves forced dieting, limited or no access to needed water or food'  
281 in SW ( $\chi^2=10.1$ ,  $p\leq.001$ ). However, in several variables, a substantially higher  
282 proportion of female than male athletes was observed, e.g. athletes with an eating  
283 disorder in WP and DV/HD, 'try to lose weight now' in SW, experienced  
284 harassment/abuse themselves in SW and HD (see Table 2). Further, it is interesting  
285 to note that a similar proportion of female and male SW reported a current need for  
286 psychotherapy, and that in WP more males than females had experienced  
287 harassment/abuse themselves. The latter concerns specifically 'inappropriate  
288 training' and 'intentional hitting, beating, or kicking (not fouls or rough play)'.

289 Comparing *female athletes* competing in AS, SW, DV/HD and WP, significant  
290 differences were observed with regard to eating disorders ( $\chi^2=8.4$ ,  $p<.05$ ), 'try to  
291 lose weight now' ( $\chi^2=11.0$ ,  $p<.05$ ) and the need for psychotherapeutic support

292 (Chi<sup>2</sup>=15.6, p<.05). Also, age (F=8.1, p<.001) and the perception of the occurrence of  
293 harassment/abuse in their sport (F=5.8, p<.01) differed significantly between the four  
294 disciplines (see Table 2). Significant differences between disciplines were observed  
295 for female athletes who experiences themselves 'unwanted comments about body or  
296 appearance' (Chi<sup>2</sup>=27.8, p<.001) ranging from AS (n=39, 55.7%) to WP (n=7;  
297 14.9%), and 'inappropriate training' (Chi<sup>2</sup>=8.1, p<.05) ranging from AS (n=13, 18.8%)  
298 to DV/HD (n=0). 'Forced dieting, limited or no access to needed water or food'  
299 ranged from AS (n=13, 17.1%) to DV/HD (n=1, 3.8%) but the difference did not reach  
300 statistical significance (Chi<sup>2</sup>=6.5, p<.09) (see Table 2). In five of the 13 situations of  
301 harassment/abuse, female AS had the highest percentage of affected athletes, and  
302 in four female SW.

303 Comparing *male athletes* between three disciplines, age (F=6.6, p<.01), the  
304 perception of the occurrence of harassment/abuse in their sport (F=4.6, p<.05) and  
305 the proportion of athletes who had witnessed or experienced harassment/abuse  
306 (Chi<sup>2</sup>=13.5, p<.05) differed significantly (see Table 2). Further differences, such as  
307 more SW than WP or DV/HD were classified as depressed (31.9% vs 12.5% resp  
308 15.4%) and needed psychotherapeutic support currently (23.3% vs 15.2% resp.  
309 9.7%), were not statistically significant. Also differences in the 13 situations of  
310 harassment/abuse did not reach significance between disciplines in male athletes,  
311 most probably because of small numbers (see Table 2).

312

### 313 **DISCUSSION**

314 This study is the first to evaluate mental health and harassment/abuse in elite aquatic  
315 athletes. About a quarter of athletes were classified as **depressed**, which is  
316 consistent with previous publications.<sup>20-22</sup> In the general population and other studies  
317 on athletes,<sup>21,23</sup> more female than male athletes reported symptoms of depression.

318 This also applies to the present study, except for swimmers. The prevalence of  
319 depression in male swimmers was about twice as high as in male athletes of the  
320 other aquatic disciplines. Our study demonstrated a significant correlation between  
321 the depression score and the athletes *i*) symptoms/health complaints and *ii*) their  
322 effect on performance in the four weeks prior to the WC. The intersection between  
323 injury and mental health is multi-faceted as elite sport can have stressors that  
324 increase the risk of both mental health disorders and injury. In addition, injury may  
325 trigger mental health symptoms while conversely, mental health disorders may  
326 prolong recovery from injury.<sup>4</sup>

327 More than a third of the athletes were screened as having an **eating disorder**,  
328 with a higher proportion of female (40%) than male athletes (27%), and highest in AS  
329 (54.1%). This finding is not surprising as AS is an aesthetic judged sport, where a  
330 quintessential lean body composition is implicitly valued in the culture of the sport.<sup>24</sup>  
331 Interestingly, in SW, there were equal proportions of female and males (28.1% vs  
332 26.4%) with eating disorders which could be related to the gender-neutral importance  
333 of body composition on performance (decreasing drag), rather than the more  
334 common culturally-driven body image reasons that more often influence female than  
335 male athletes. Overall, a quarter of the athletes stated that they were trying to lose  
336 weight during the WC, however this applied to more than 40% of females in the two  
337 judged disciplines (AS, DV/HD). This finding is disturbing with almost half of the  
338 competing athletes in the highest competition level in the world engaging in weight  
339 loss behaviours that could affect their nutritional fuelling of performance. It also has  
340 significant medical implications for team physicians with the associated risks of  
341 weight loss during highly competitive sport. Interestingly, in WP, the male and female  
342 reporting of current weight loss behaviours was similar (about 20%), which is high for  
343 males and low for females. The estimated prevalence of eating disorders and/or

344 disordered eating among athletes in general, ranges from 0% to 19% in males and  
345 from 6% to 45% in females.<sup>25</sup>

346 In the present study, 45% of participating athletes wanted or needed  
347 **psychotherapeutic support** for personal or mental health problems either  
348 previously (29%) or currently (16%). Similar results were reported in a survey on elite  
349 female football players (24% previous; 16% currently).<sup>18</sup> Consistent with the high  
350 prevalence of depression in male swimmers, approximately 25% of both female and  
351 male swimmers were *currently* wanting or needing professional mental health  
352 support. These findings underscore the need for team physicians of elite athletes to  
353 have the core clinical competency to diagnose and treat mental health disorders<sup>26</sup>,  
354 and for organizing committees and International Federations to incorporate mental  
355 health professionals into the medical care services for large multi-sport events.<sup>27</sup>

356 Over one-third (36%) of athletes participating in the present study stated that  
357 **harassment/abuse** was either 'very likely' or 'likely' to occur in their sport. Similar  
358 percentages were found in youth athletes participating in the Youth Olympic Games  
359 2018.<sup>10</sup> In the present study 15% of the athletes reported to have experienced  
360 harassment/abuse in their sports environment themselves. For specific situations, the  
361 frequency ranged from 'unwanted comments about body or appearance' (40.2%) to  
362 'rewards in sport for sexual favours' (2.5%) and 'rape' (0.3%). A study of German and  
363 Belgian-Dutch elite athletes found a prevalence of psychological (72%), physical  
364 (25%) and sexual harassment/abuse (31%) with significant overlap of types.<sup>28</sup> A  
365 cross-sectional study of 198 elite Swedish athletics athletes reported a sexual abuse  
366 prevalence of 11% (females 16% and males 4%) and physical abuse of 18%  
367 (females 14% and males 23%).<sup>29</sup> A survey of 1001 elite Canadian athletes from 64  
368 sports reported a prevalence of 59% for emotional harm, 67% for neglect, 20% for  
369 sexual harm and 12% for physical harm.<sup>6</sup> In the present study, athletes who have

370 experienced harassment or abuse in their sports environment themselves had higher  
371 average scores of the depression and of eating disorders, and more of them needed  
372 psychotherapeutic support than those who have not witnessed nor experienced it.  
373 While our findings are consistent with reports in the literature, they remain alarming.  
374 Validated prevention strategies to decrease harassment/abuse in the aquatic sports  
375 are urgently required.

376 In this survey, only 19% stated that they would **officially report**  
377 **harassment/abuse**, while 13% would say nothing, and 20% were unsure what to do.  
378 These numbers are consistent with the Canadian study who found that those athletes  
379 who had experienced harassment/abuse, 56% did not report their experience, and  
380 84% did not submit a formal complaint.<sup>6</sup> These findings demonstrate the need *i)* to  
381 encourage athletes to report their abuse, *ii)* to develop safe reporting mechanisms,  
382 and *iii)* to ensure experienced athlete support systems are accessible.

383 There are **limitations** to this study inherent in the retrospective design  
384 including selection and recall bias. In addition, the response rate was low which could  
385 result in an over- or underestimation of the prevalence.<sup>30</sup> However, we believe that a  
386 selection bias is unlikely, since responses to the questions on health complaints in  
387 the 4 weeks prior to the WC were similar to the athlete surveys in FINA WC 2013.<sup>11-</sup>

388 <sup>13</sup>

389

## 390 **CONCLUSIONS**

391 This novel study has uncovered the stark realities that lie beneath the surface of the  
392 water for elite aquatic athletes. Attention is needed to improve understanding through  
393 targeted research regarding differences between genders and disciplines, as well as  
394 to develop educational initiatives to decrease the stigma of mental health in sport.  
395 Mechanisms are required to improve athlete help-seeking, to facilitate reporting of

396 harassment/abuse, and to enhance athlete support systems. Prevention strategies  
397 should be implemented and evaluated to address both athlete mental health  
398 challenges and harassment/abuse in the aquatic sports. The results of this study  
399 should serve as an alarm to engage and empower athletes and their entourage to  
400 work together with FINA to address athlete mental well-being and Safe Sport in the  
401 daily training environments of the swimming pools around the world.

402 „There are times where I feel absolutely worthless, where I completely shut down but  
403 have this bubbling anger that is through the roof. If I'm being honest, more than once  
404 I've just screamed out loud, "I wish I wasn't me!... The more you understand that it's  
405 ok, to not be ok – it's so powerful" Michael Phelps (2020)<sup>31</sup>  
406

407

408

409

#### 410 **PRACTICAL IMPLICATIONS**

- 411 • Sport organizations should develop strategies to decrease stigma related to  
412 athlete mental health problems.
- 413 • Team physicians should be educated to have the clinical competency to  
414 screen, diagnose and treat mental health problems in elite aquatic athletes  
415 regarding differences between genders and disciplines.
- 416 • Prevention strategies should be implemented to decrease the burden of  
417 mental health issues and harassment/abuse in sport.
- 418 • Reporting mechanisms and athlete support systems should be made available  
419 and accessible for athletes experiencing harassment/abuse in sport.

420

421 **Acknowledgement:** The authors greatly appreciate the cooperation of the athletes  
422 attending the FINA World Aquatic Championships who volunteered their time to  
423 provide data for this project, and to FINA for supporting the concept and logistics of  
424 the study.



425

426

427

428

429 **REFERENCES**

430

431

432

433

434

435

436

437

438

439

440

441

442

443

444

445

446

447

448

449

450

451

452

453

454

455

456

457

458

459

460

461

462

463

464

465

466

467

468

469

1. Scutti S. "Michael Phelps: I am extremely thankful that I did not take my life" CNN 20 Jan 2018. Available: <https://www.cnn.com/2018/01/19/health/michael-phelps-depression/index.html> [Accessed 22 Sep 2020]
2. Drehs W. Michael Phelps' final turn. 2016. ESPN the Magazine. Available: [https://www.espn.com/espn/feature/story/\\_/id/16425548/michael-phelps-prepares-life-2016-rio-olympics](https://www.espn.com/espn/feature/story/_/id/16425548/michael-phelps-prepares-life-2016-rio-olympics) [Accessed 22 Sep 2020]
3. Gouttebauge V, Castaldelli-Maia JM, Gorczynski P, et al. Occurrence of mental health symptoms and disorders in current and former elite athletes: a systematic review and meta-analysis. *Br J Sports Med*. 2019;53:700-6. <http://dx.doi.org.libaccess.lib.mcmaster.ca/10.1136/bjsports-2019-100671>
4. Reardon C, Hainline B, Aron CM, et al. Mental health in elite athletes: International Olympic Committee consensus statement (2019). *Br J Sports Med* 2019;53(11):667-99. <http://dx.doi.org/10.1136/bjsports-2019-100715>
5. Timpka T, Spreco A, Dahlstrom et al. Suicidal thoughts (ideation) among elite athletics (track and field) athletes: cross-sectional study of associations with sexual and physical abuse victimization, aspects of sports participation, and psychological and behavioural resourcefulness. *Br J Sports Med* 2020 <https://doi:10.1136/bjsports-2019-101386>
6. Kerr G, Willson E, Stirling A. Prevalence of maltreatment among current and former national team athletes. University of Toronto in partnership with Athletes CAN 20 April 2019. Available: [http://athletescan.com/sites/default/files/images/prevalence\\_of\\_maltreatment\\_reporteng.pdf](http://athletescan.com/sites/default/files/images/prevalence_of_maltreatment_reporteng.pdf) [Accessed 22 Sep 2020]
7. International Olympic Committee. Consensus Statement on "Sexual harassment and abuse in sport". February 2007. Available: <https://www.olympic.org/news/ioc-adopts-consensus-statement-on-sexual-harassment-and-abuse-in-sport> [Accessed 22 Sep 2020]

- 470  
471  
472 8. International Olympic Committee Safeguarding Framework, Rio de Janeiro  
473 Olympic Games 2016. Available:  
474 [https://cdn.dosb.de/alter\\_Datenbestand/Bilder\\_allgemein/Veranstaltungen/Rio](https://cdn.dosb.de/alter_Datenbestand/Bilder_allgemein/Veranstaltungen/Rio_2016/IOC_Framework_for_safeguarding_athletes.pdf)  
475 [\\_2016/IOC\\_Framework\\_for\\_safeguarding\\_athletes.pdf](https://cdn.dosb.de/alter_Datenbestand/Bilder_allgemein/Veranstaltungen/Rio_2016/IOC_Framework_for_safeguarding_athletes.pdf) [Accessed 22 Sep  
476 2020]
- 477
- 478 9. Mountjoy M, Brackenridge C, Arrington M, et al. The IOC Consensus  
479 Statement: Harassment and abuse (non-accidental violence) in sport. *Br J*  
480 *Sports Med* 2016; (17):1019-29. <https://doi.org/10.1136/bjsports-2016-096121>
- 481
- 482 10. Mountjoy M, Vertommen T, Burrows K, et al., #SafeSport: Safeguarding  
483 initiatives at the Youth Olympic Games 2018. *Br J Sports Med* 2020;54:176-  
484 82. <https://doi.org/10.1136/bjsports-2019-101461>
- 485
- 486 11. Mountjoy M, Junge A, Benjamin S, et al. Competing with injuries: injuries prior  
487 to and during the 15th FINA World Championships 2013 (aquatics). *Br J*  
488 *Sports Med*. 2015;49(1):37-43. <http://dx.doi.org/10.1136/bjsports-2014-093991>
- 489
- 490
- 491 12. Prien A, Mountjoy M, Miller J, et al. Injury and illness in aquatic sport – how is  
492 the risk? A comparison of results from three FINA World Championships. *Br J*  
493 *Sports Med* 2017;51(4):277-82. [http://dx.doi.org/10.1136/bjsports-2016-](http://dx.doi.org/10.1136/bjsports-2016-096075)  
494 [096075](http://dx.doi.org/10.1136/bjsports-2016-096075)
- 495
- 496
- 497 13. Mountjoy M, Junge A, Slysz J, et al. An uneven playing field: Athlete injury,  
498 illness, load, and daily training environment in the year prior to the FINA World  
499 Championships, 2017. [published online ahead of print, 2019 Dec 12]. *Clin J*  
500 *Sport Med* 2019;. <https://doi:10.1097/JSM.0000000000000814>
- 501
- 502
- 503 14. Clarsen B, Rønsen O, Myklebust G, et al. The Oslo Sports Trauma Research  
504 Center questionnaire on health problems: a new approach to prospective  
505 monitoring of illness and injury in elite athletes. *Br J Sports Med* 2014;48:754-  
506 60. <http://dx.doi.org/10.1136/bjsports-2012-092087>
- 507
- 508
- 509 15. Björgvinsson T, Kertz SJ, Bigda-Peyton JS, et al. Psychometric properties of  
510 the CES-D-10 in a psychiatric sample. *Assessment* 2013, 20, 429-36.  
511 <https://doi.org/10.1177/1073191113481998>
- 512
- 513
- 514 16. Zhang W, O'Brien N, Forrest JI, et al. Validating a shortened depression scale  
515 (10 item CES-D) among HIV-positive people in British Columbia, Canada.  
516 *PLoS One*. 2012;7(7):e40793. <https://doi.org/10.1371/journal.pone.0040793>

- 517  
518  
519  
520  
521  
522  
523  
524  
525  
526  
527  
528  
529  
530  
531  
532  
533  
534  
535  
536  
537  
538  
539  
540  
541  
542  
543  
544  
545  
546  
547  
548  
549  
550  
551  
552  
553  
554  
555  
556  
557  
558  
559  
560  
561  
562  
563  
564  
565  
566
17. Martinsen M, Holme I, Pensgaard AM, et al. The development of the Brief Eating Disorder in Athletes Questionnaire (BEDA-Q). *Med Sci Sport Exer* 2014;46(8):1666–75. <https://doi.org/10.1249/mss.0000000000000276>
  18. Junge A, Prinz B. Depression and anxiety symptoms in 17 teams of female football players including 10 German first league teams. *Br J Sports Med* 2019;53:471–7. <http://dx.doi.org/10.1136/bjsports-2017-098033>
  19. Timpka T, Janson S, Jacobsson J. et al. Protocol design for large-scale cross-sectional studies of sexual abuse and associated factors in individual sports: Feasibility study in Swedish athletics. *J Sport Sci Med* 2015;14:179-87. PMID: 25729306; PMCID: PMC4306771
  20. Armstrong S, Oomen-Early J. Social connectedness, self-esteem, and depression symptomatology among collegiate athletes versus non-athletes. *J Am Coll Health* 2009;57:521–6. <https://doi.org/10.3200/JACH.57.5.521-526>
  21. Gulliver A, Griffiths KM, Mackinnon A, et al. The mental health of Australian elite athletes. *J Sci Med Sport* 2015;18:255–61. <https://doi.org/10.1016/j.isams.2014.04.006>
  22. Yang J, Peek-Asa C, Corlette JD, et al. Prevalence of and risk factors associated with symptoms of depression in Competitive Collegiate Student Athletes. *Clin J Sport Med* 2007;17:481–7. <https://doi:10.1097/JSM.0b013e31815aed6b>
  23. Junge A, Feddermann-Demont N. Prevalence of depression and anxiety in top-level male and female football players. *BMJ Open Sport Exerc Med* 2016;2:e000087. <http://dx.doi.org/10.1136/bmjsem-2015-000087>
  24. Ferrand C, Magnan C, Rouveix M, et al. Disordered eating, perfectionism and body-esteem of elite synchronized swimmers. *Eur J Sport Sci* 2007: 223–30. <http://doi:10.1080/17461390701722168>
  25. Bratland-Sanda S, Sundgot-Borgen J. Eating disorders in athletes: overview of prevalence, risk factors and recommendations for prevention and treatment. *Eur J Sport Sci* 2013;13:499–508. <https://doi.org/10.1080/17461391.2012.740504>
  26. Gouttebauge V, Bindra A, Blauwet C, et al. International Olympic Committee (IOC) Sport Mental Health Assessment Tool 1 (SMHAT-1) and Sport Mental

- 567 Health Recognition Tool 1 (SMHRT-1): towards better support of athletes'  
 568 mental health. *Br J Sports Med*. 2020:bjsports-2020-102411.  
 569 <http://doi:10.1136/bjsports-2020-10241>  
 570  
 571  
 572 27. Mountjoy M, Moran J, Amed H, et al. Athlete health and safety at large sport  
 573 events: the development of consensus-driven guidelines. *Br J Sports Med*  
 574 2020. [in publication]  
 575  
 576  
 577 28. Ohlert J, Vertommen T, Rulofs B, et al., Elite athletes' experiences of  
 578 interpersonal violence in organised sport in Germany, the Netherlands, and  
 579 Belgium. *Europ J Sport Sci* 2020; 1-10. [published online ahead of print, 2020  
 580 Jul 7]. <https://doi:10.1080/17461391.2020.1781266>  
 581  
 582  
 583 29. Timpka T, Janson S, Jacobsson J et al. Lifetime sexual and physical abuse  
 584 among elite athletics athletes: A cross-sectional study of prevalence and  
 585 correlates with athletics injury. *Br J Sports Med* 2014;48:667.  
 586 <http://dx.doi.org/10.1136/bjsports-2014-093494.285>  
 587  
 588  
 589 30. Kawakami N, Yasuma N, Watanabe K, et al. Association of response rate and  
 590 prevalence estimates of common mental disorders across 129 areas in a  
 591 nationally representative survey of adults in Japan. *Soc Psychiatry Psychiatr*  
 592 *Epidemiol*. 2020: <https://doi.org/10.1007/s00127-020-01847-3>  
 593  
 594  
 595 31. Phelps M. as told to Drehs W. „Michael Phelps: ,Thi is the most overwhelmed  
 596 I've ever felt'. *ESPN* 18 May 2020. Available:  
 597 [https://www.espn.com/olympics/story/\\_/id/29186389/michael-phelps-most-](https://www.espn.com/olympics/story/_/id/29186389/michael-phelps-most-overwhelmed-ever-felt)  
 598 [overwhelmed-ever-felt](https://www.espn.com/olympics/story/_/id/29186389/michael-phelps-most-overwhelmed-ever-felt) [Accessed 22 Sep 2020]  
 599  
 600

## 601 FIGURES and TABLES

602

603

604 Figure 1: Average score on the depression (CESD-R-10, dark blue) and the eating  
 605 disorder (BEDA-Q, light blue) scale in athletes with different experiences of  
 606 harassment/abuse.  
 607

608

609

610 **TABLES**

611 **Table 1:** Athlete responses to the question: "Have you ever witnessed or  
 612 experienced yourself any of the following situations in your sports environment? If  
 613 yes, please answer both questions."  
 614

|                                                                                   | no           | who was the victim?* |                 | who did it?* |                 |       |
|-----------------------------------------------------------------------------------|--------------|----------------------|-----------------|--------------|-----------------|-------|
|                                                                                   |              | myself               | another athlete | coach        | another athlete | other |
| Unwanted comments about body or appearance (n=361)                                | 216<br>59.8% | 91<br>47+44          | 98<br>54+44     | 95           | 63              | 27    |
| Exclusion, isolation or intentional denial of attention and/or support (n=356)    | 276<br>77.5% | 44<br>27+17          | 53<br>36+17     | 26           | 51              | 16    |
| Bullying / cyber bullying (n=359)                                                 | 286<br>79.7% | 39<br>22+17          | 52<br>34+17     | 20           | 46              | 20    |
| Comments, jokes, messages or gestures of a sexual nature (n=361)                  | 296<br>82.0% | 30<br>9+21           | 56<br>35+21     | 29           | 42              | 13    |
| Negative comments on race, gender, religion or country of origin (n=361)          | 302<br>83.7% | 22<br>12+10          | 47<br>37+10     | 17           | 39              | 23    |
| Inappropriate training, e.g. forced physical exertion beyond capabilities (n=357) | 306<br>85.7% | 39<br>22+17          | 29<br>12+17     | 45           | 2               | 1     |
| Intentional hitting, beating or kicking (not fouls or rough play) (n=360)         | 317<br>88.1% | 18<br>8+10           | 35<br>25+10     | 16           | 22              | 7     |
| Forced dieting, limited or no access to needed water or food (n=361)              | 323<br>89.5% | 27<br>13+14          | 25<br>11+14     | 28           | 2               | 4     |
| Unsafe training conditions (n=358)                                                | 322<br>89.9% | 30<br>14+16          | 22<br>6+16      | 27           | 2               | 4     |
| Unwanted and unnecessary touching of the body (n=360)                             | 324<br>90.0% | 18<br>6+12           | 30<br>18+12     | 18           | 16              | 9     |
| Unwanted touching of breast, buttock, genitals or attempt to kiss (n=361)         | 336<br>93.1% | 11<br>0+11           | 25<br>14+11     | 11           | 14              | 3     |
| Forced use of supplements / medication (n=362)                                    | 350<br>96.7% | 7<br>2+5             | 10<br>5+5       | 9            | 4               | 4     |
| Rewards in sport for sexual favours (n=362)                                       | 353<br>97.5% | 3<br>2+1             | 7<br>6+1        | 7            | 1               | 0     |
| other, please specify (n=327)                                                     | 323<br>98.8% | 2<br>1+1             | 3<br>2+1        | 1            | 1               |       |

615 \*Multiple answers are possible; + number of athletes who selected both "myself" and  
 616 "another athlete"  
 617

618 **Table 2.** Characteristics of all elite aquatic athletes, and of male and female athletes from different selected disciplines (i.e. results  
 619 from open water swimmers and male artistic swimmers not presented separately due to small numbers but included in total) and  
 620 number (%) of athletes who experienced different types of harassment/abuse themselves with regard to gender and discipline.  
 621

|                                              | <b>Swimming</b> |            | <b>Water Polo</b> |            | <b>Diving / High Diving</b> |            | <b>Artistic Swimming</b> | <b>Total</b> |
|----------------------------------------------|-----------------|------------|-------------------|------------|-----------------------------|------------|--------------------------|--------------|
|                                              | female          | male       | female            | male       | female                      | male       | female                   | both         |
| Gender                                       |                 |            |                   |            |                             |            |                          |              |
| Number of responding athletes                | 65              | 67         | 48                | 34         | 29                          | 34         | 77                       | 375          |
| <b>Age</b>                                   |                 |            |                   |            |                             |            |                          |              |
| Mean (sd)                                    | 21.4 (4.9)      | 22.3 (5.7) | 23.1 (3.9)        | 24.8 (4.1) | 23.3 (5.9)                  | 26.7 (7.4) | 19.6 (3.8)               | 22.4 (5.4)   |
| <b>Depression (CES-D-10)</b>                 |                 |            |                   |            |                             |            |                          |              |
| Athletes with depression                     | 12 (27.3%)      | 15 (31.9%) | 9 (27.3%)         | 3 (12.5%)  | 6 (23.1%)                   | 4 (15.4%)  | 15 (28.3%)               | 70 (26.1%)   |
| <b>Eating disorder (BEDA-Q)</b>              |                 |            |                   |            |                             |            |                          |              |
| Athletes with eating disorder                | 16 (28.1%)      | 14 (26.4%) | 16 (38.1%)        | 8 (27.6%)  | 11 (42.3%)                  | 8 (27.6%)  | 33 (54.1%)               | 111 (35.2%)  |
| Lose weight now                              | 15 (24.2%)      | 9 (14.8%)  | 9 (19.6%)         | 6 (18.8%)  | 12 (41.4%)                  | 4 (12.5%)  | 33 (44.0%)               | 90 (25.3%)   |
| <b>Need for psychotherapy</b>                |                 |            |                   |            |                             |            |                          |              |
| No expressed need                            | 28 (45.2%)      | 33 (55.0%) | 20 (42.6%)        | 24 (72.7%) | 17 (58.6%)                  | 22 (71.0%) | 46 (61.3%)               | 198 (55.6%)  |
| Currently receiving                          | 16 (25.8%)      | 14 (23.3%) | 4 (8.5%)          | 5 (15.2%)  | 5 (17.2%)                   | 3 (9.7%)   | 7 (9.3%)                 | 57 (16.0%)   |
| Previously received                          | 18 (29.0%)      | 13 (21.7%) | 23 (48.9%)        | 4 (12.1%)  | 7 (24.1%)                   | 6 (19.4%)  | 22 (29.3%)               | 101 (28.4%)  |
| <b>Harassment /abuse</b>                     |                 |            |                   |            |                             |            |                          |              |
| Likely in the athlete's sport <sup>(a)</sup> | 3.0 (1.4)       | 3.2 (1.4)  | 3.0 (1.4)         | 3.3 (1.3)  | 2.2 (1.4)                   | 2.4 (1.3)  | 2.2 (1.2)                | 2.8 (1.4)    |
| Not experienced nor witnessed                | 47 (75.8%)      | 51 (87.9%) | 35 (77.8%)        | 18 (58.1%) | 22 (84.6%)                  | 27 (87.1%) | 57 (81.4%)               | 271 (79.5%)  |
| Experienced themselves                       | 9 (14.5%)       | 4 (6.9%)   | 3 (6.7%)          | 5 (16.1%)  | 4 (15.4%)                   | 2 (6.5%)   | 9 (12.9%)                | 39 (11.4%)   |
| Witnessed in another athlete                 | 3 (4.8%)        | 2 (3.4%)   | 5 (11.1%)         | 5 (16.1%)  | 0                           | 1 (3.2%)   | 2 (2.9%)                 | 19 (5.6%)    |

|                                                                                   |            |            |            |            |            |            |            |                   |
|-----------------------------------------------------------------------------------|------------|------------|------------|------------|------------|------------|------------|-------------------|
| Experienced and witnessed                                                         | 3 (4.8%)   | 1 (1.7%)   | 2 (4.4%)   | 3 (9.7%)   | 0          | 1 (3.2%)   | 2 (2.9%)   |                   |
| <b>Seek assistance</b>                                                            |            |            |            |            |            |            |            |                   |
| No                                                                                | 6 (10.0%)  | 15 (25.9%) | 2 (4.7%)   | 5 (17.2%)  | 2 (8.0%)   | 2 (6.7%)   | 7 (9.9%)   | 43 (12.9%)        |
| Maybe                                                                             | 10 (16.7%) | 16 (27.6%) | 8 (18.6%)  | 7 (24.1%)  | 5 (20.0%)  | 8 (26.7%)  | 13 (18.3%) | 68 (20.4%)        |
| Friends or family                                                                 | 35 (58.3%) | 11 (19.0%) | 25 (58.1%) | 14 (48.3%) | 12 (48.0%) | 13 (43.3%) | 41 (57.7%) | 161 (48.2%)       |
| Official contact to seek help                                                     | 5 (8.3%)   | 12 (20.7%) | 7 (16.3%)  | 3 (10.3%)  | 3 (12.0%)  | 6 (20.0%)  | 5 (7.0%)   | 43 (12.9%)        |
| Friends/family and official contact                                               | 4 (6.7%)   | 4 (6.9%)   | 1 (2.3%)   | 0          | 3 (12.0%)  | 1 (3.3%)   | 5 (7.0%)   | 19 (5.7%)         |
| <b>Athletes who experienced the specified type of harassment/abuse themselves</b> |            |            |            |            |            |            |            |                   |
| Unwanted comments about body or appearance                                        | 13 (20.6%) | 8 (11.9%)  | 7 (24.9%)  | 4 (12.1%)  | 8 (32.0%)  | 5 (15.2%)  | 39 (55.7%) | 91 (25.2%) of 361 |
| Exclusion, isolation, or intentional denial of attention and/or support           | 13 (21.0%) | 8 (12.1%)  | 4 (8.5%)   | 3 (9.1%)   | 1 (3.8%)   | 2 (6.1%)   | 11 (16.4%) | 44 (12.4%) of 356 |
| Bullying / cyber bullying                                                         | 10 (16.1%) | 4 (6.0%)   | 4 (8.7%)   | 1 (3.0%)   | 3 (11.5%)  | 1 (3.0%)   | 14 (20.3%) | 39 (10.8%) of 359 |
| Comments, jokes, messages, or gestures of a sexual nature                         | 9 (14.8%)  | 5 (7.6%)   | 4 (8.5%)   | 3 (9.1%)   | 2 (7.7%)   | 1 (3.0%)   | 4 (5.6%)   | 30 (8.3%) of 361  |
| Negative comments on race, gender, religion, or country of origin                 | 3 (4.8%)   | 2 (3.0%)   | 3 (6.4%)   | 2 (6.3%)   | 2 (7.7%)   | 0          | 7 (9.9%)   | 22 (6.1%) of 361  |
| Inappropriate training, e.g. forced physical exertion beyond capabilities         | 9 (14.8%)  | 6 (9.1%)   | 3 (6.5%)   | 4 (12.1%)  | 0          | 0          | 13 (18.8%) | 39 (10.9%) of 357 |
| Intentional hitting, beating, or kicking (not fouls or rough                      | 2 (3.2%)   | 5 (7.5%)   | 3 (6.4%)   | 3 (9.1%)   | 0          | 0          | 4 (5.9%)   | 18 (5.0%) of 360  |

|                                                                   |           |          |          |          |           |          |            |                  |
|-------------------------------------------------------------------|-----------|----------|----------|----------|-----------|----------|------------|------------------|
| play)                                                             |           |          |          |          |           |          |            |                  |
| Forced dieting, limited or no access to needed water or food      | 9 (14.3%) | 0        | 2 (4.3%) | 1 (3.0%) | 1 (3.8%)  | 0        | 12 (17.1%) | 27 (7.5%) of 361 |
| Unsafe training conditions                                        | 7 (11.3%) | 4 (6.2%) | 4 (8.7%) | 1 (3.0%) | 5 (19.2%) | 2 (6.1%) | 5 (7.1%)   | 30 (8.4%) of 358 |
| Unwanted and unnecessary touching of the body                     | 8 (12.9%) | 3 (4.5%) | 4 (8.5%) | 0        | 0         | 0        | 3 (4.3%)   | 18 (5.0%) of 360 |
| Unwanted touching of breast, buttock, genitals or attempt to kiss | 5 (7.9%)  | 2 (3.0%) | 1 (2.1%) | 0        | 0         | 0        | 2 (2.9%)   | 11 (3.0%) of 361 |
| Forced use of supplements / medication                            | 3 (4.8%)  | 1 (1.5%) | 1 (2.1%) | 1 (3.0%) | 0         | 0        | 0          | 7 (1.9%) of 362  |
| Rewards in sport for sexual favours                               | 2 (3.2%)  | 1 (1.5%) | 0        | 0        | 0         | 0        | 0          | 3 (0.8%) of 362  |
| Other, please specify                                             | 1 (1.9%)  | 0        | 0        | 0        | 0         | 0        | 0          | 2 (0.6%) of 327  |

622 Numbers do not add up to responding athletes due to missing values in gender (n=2), discipline (n=12) and the respective question.  
623 (a) no =1; not likely =2; not sure =3; likely =4; very likely =5.



DO NOT COPY
